# Supplementary material for: Phylogenomics of fescue grass-derived fungal endophytes based on selected nuclear genes and the mitochondrial gene complement
Source: PubMed Central journal article supplement (PMC4028799; doi:10.1186/1471-2148-13-270), 2013-12-12

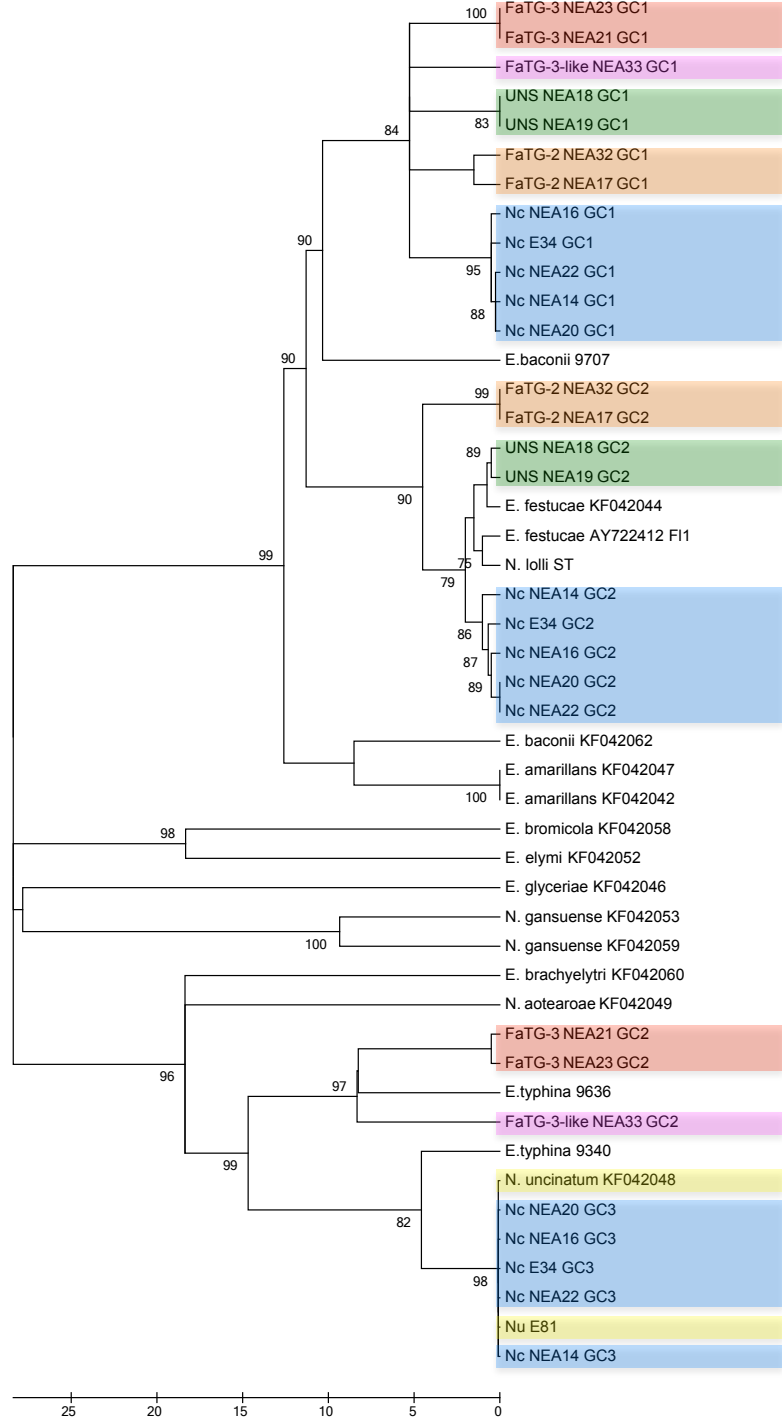

Supplement: 1471-2148-13-270-S1.pdf [file 1471-2148-13-270-S1.pdf]
